# Supplementary material for: In Vitro Efficacy of Antivirals and Monoclonal Antibodies against SARS-CoV-2 Omicron Lineages XBB.1.9.1, XBB.1.9.3, XBB.1.5, XBB.1.16, XBB.2.4, BQ.1.1.45, CH.1.1, and CL.1
Source: MDPI journal article supplement (doi:10.3390/vaccines11101533), 2023-09-28
Supplement: s1 [file s1]

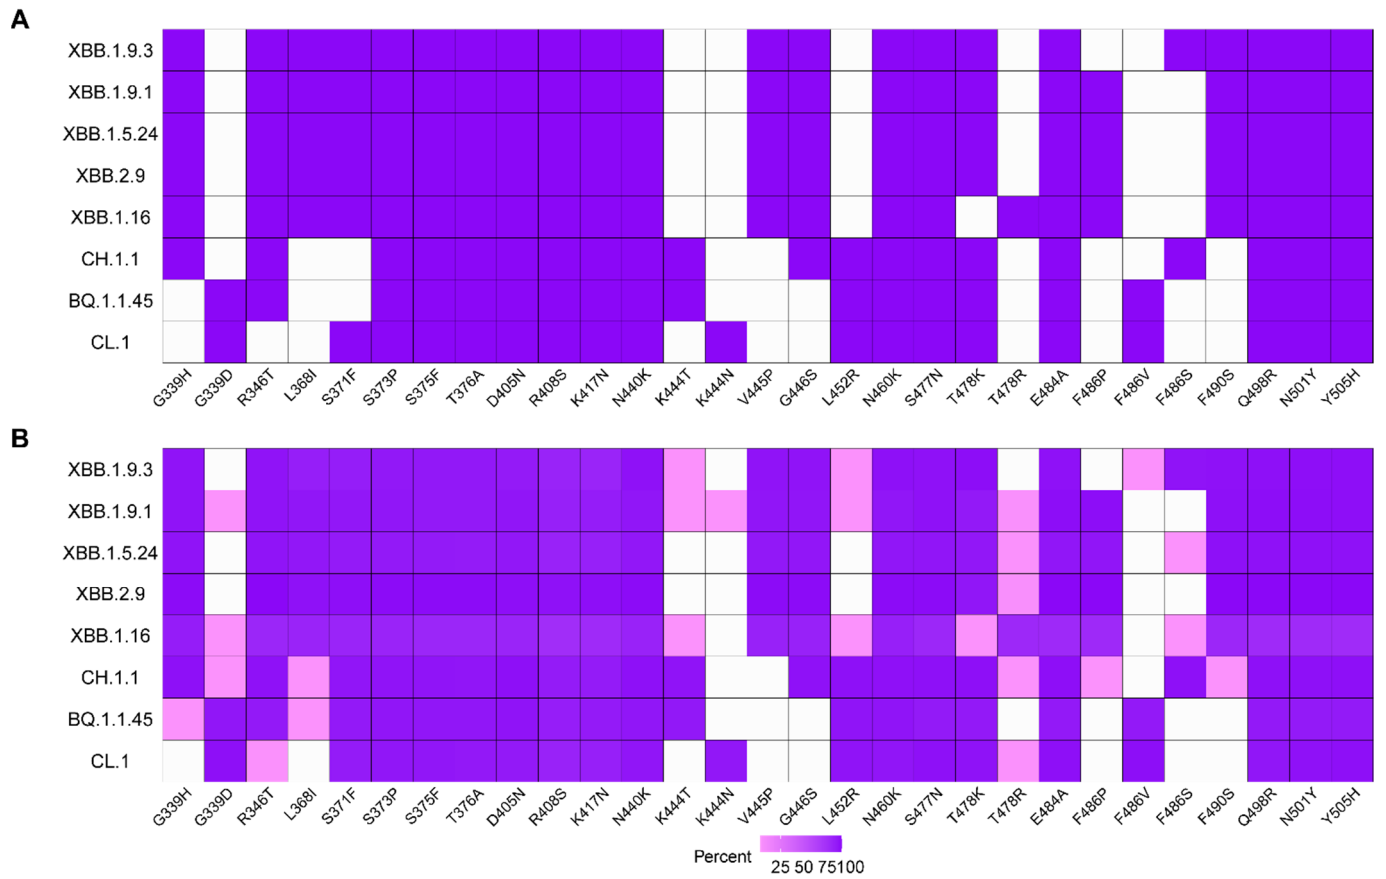

**Figure S1:** Amino acid changes have been detected in the receptor-binding domain (RBD) Spike protein of various SARS-CoV-2 variants. These changes have been detected (A) in both the isolates employed in this study and (B) the viral sequences deposited in the GISAID database. A color gradient is utilized to depict the frequency of changes, where white signifies the absence of occurrences and dark purple signifies 100% occurrence.

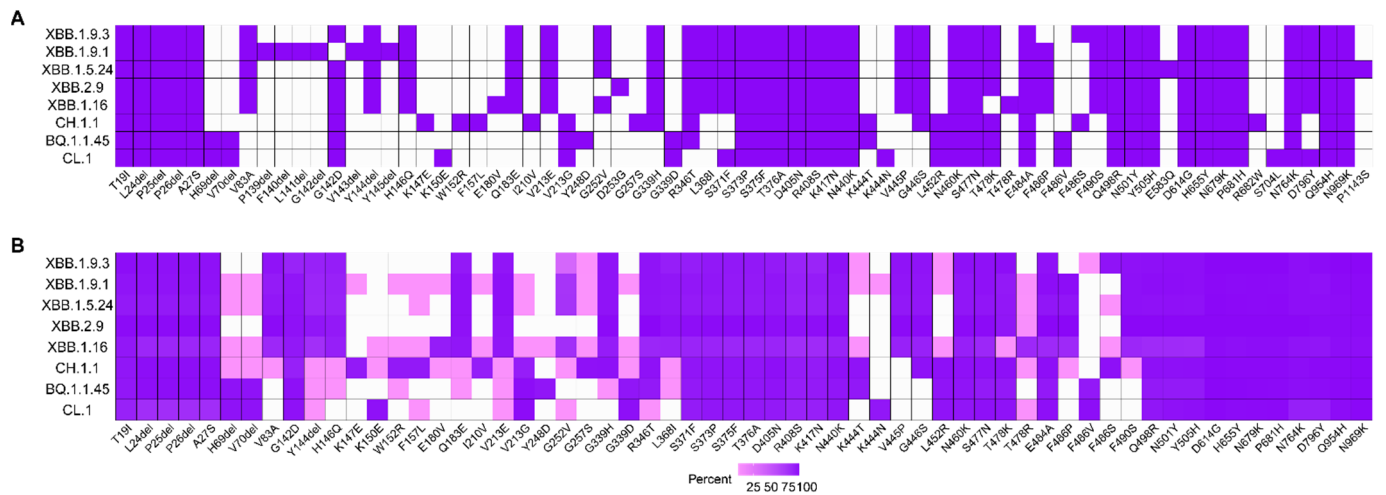

**Figure S2:** Amino acid changes have been detected in the Spike protein of various SARS-CoV-2 variants. These changes have been detected (A) in both the isolates employed in this study and (B) the viral sequences deposited in the GISAID database. A color gradient is utilized to depict the frequency of changes, where white signifies the absence of occurrences and dark purple signifies 100% occurrence.

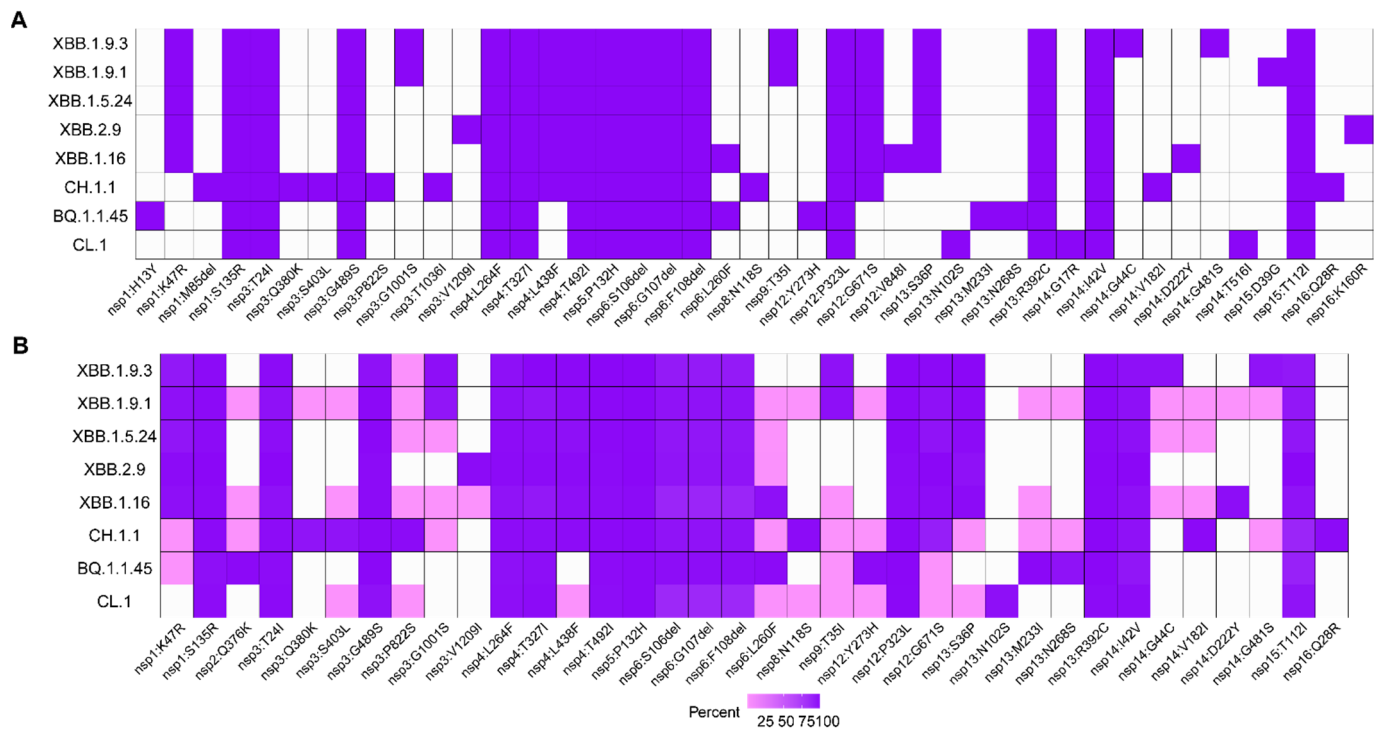

**Figure S3:** Amino acid changes have been detected in the genome of various SARS-CoV-2 variants. These changes have been detected (A) in both the isolates employed in this study and (B) the viral sequences deposited in the GISAID database. A color gradient is utilized to depict the frequency of changes, where white signifies the absence of occurrences and dark purple signifies 100% occurrence.

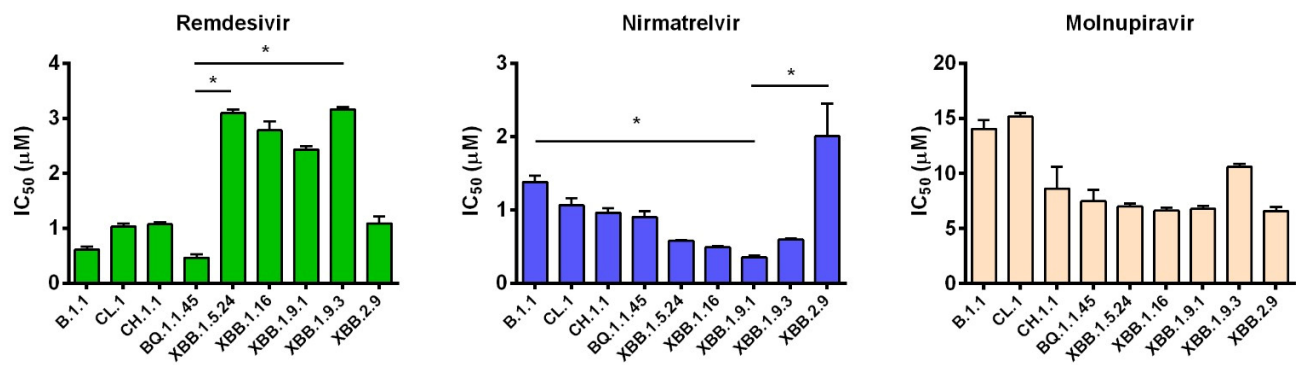

**Figure S4.** IC<sub>50</sub> values (μM) for SARS-CoV-2 variants investigated in this study. Data are represented as means ± SEM. ANOVA Dunnett's multiple comparisons test. An asterisk indicates significant differences ( $p < 0.05$ ).

**Table S1.** IC50 values ( $\mu\text{M}$ ) for SARS-CoV-2 variants investigated in this study.

|            | <b>Remdesivir</b> | <b>Nirmatrelvir</b> | <b>Molnupiravir</b> |
|------------|-------------------|---------------------|---------------------|
| B.1.1      | 0.6019            | 1.391               | 19.85               |
| CL.1       | 1.064             | 1.055               | 15.31               |
| CH.1.1     | 1.073             | 0.9543              | 6.965               |
| BQ.1.1.45  | 0.4497            | 0.8614              | 7.235               |
| XBB.1.5.24 | 3.103             | 0.5747              | 7.208               |
| XBB.1.16   | 2.763             | 0.491               | 6.694               |
| XBB.1.9.1  | 2.428             | 0.3509              | 6.672               |
| XBB.1.9.3  | 3.153             | 0.5914              | 10.57               |
| XBB.2.9    | 1.100             | 1.869               | 6.777               |
